# Supplementary material
Source: publisher figshare collection journal article supplement (https://karger.figshare.com/ndownloader/files/6487356)
Supplement: Supplementary file 1 [file 6487356]

| **Table 2a** Results of primary and secondary outcomes demonstrated for all study participants who either completed treatment or waiting time and follow-up assessments after 4 months: means and *SD* by group and assessment time point, within group effect sizes, results of repeated measures ANOVAs (time x group interaction), and controlled effect sizes | | | | | | | | | | | | | |
| --- | --- | --- | --- | --- | --- | --- | --- | --- | --- | --- | --- | --- | --- |
|  | *TF-CBT* | | | | |  | *Waiting list* | | | | |  |  | |
| Outcome | *n* | *baseline*  *M* (*SD*) | *2 months*  *M* (*SD*) | *4 months*  *M* (*SD*) | *Pre-post effect size d* |  | *n* | *baseline*  *M* (*SD*) | *2 months*  *M* (*SD*) | *4 months*  *M* (*SD*) | *Pre-post effect size d* | Interaction  Time x Group | *Controlled effect size d* | |
| **Primary: CAPS-CA total** | **60** | **58.90**  **(16.81)** | **-** | **26.35**  **(23.47)** | **1.94** |  | **73** | **56.73 (15.32)** | **-** | **40.70**  **(24.74)** | **1.05** | ***F*(1) = 19.09**  ***p* < .001** | **0.73** | |
|  |  |  |  |  |  |  |  |  |  |  |  |  |  | |
| Re-experiencing | 60 | 21.90  (7.00) | - | 9.82  (8.87) | 1.73 |  | 73 | 20.58  (7.13) | - | 14.22  (9.41) | 0.89 | *F*(1) = 11.80  *p* = .001 | 0.67 | |
| Avoidance | 60 | 19.62  (8.28) | - | 8.78  (9.20) | 1.30 |  | 73 | 19.27  (7.59) | - | 14.67  (10.77) | 0.61 | *F*(1) = 14.06  *p* < .001 | 0.63 | |
| Hyperarousal | 60 | 17.38  (7.54) | - | 7.75  (8.44) | 1.28 |  | 73 | 16.88  (6.72) | - | 11.81  (8.82) | 0.75 | *F*(1) = 9.34  *p* = .003 | 0.54 | |
| **Secondary:** |  |  |  |  |  |  |  |  |  |  |  |  |  | |
| UCLA-Self | 55 | 36.95  (10.45) | 31.02  (13.49) | 19.65  (13.14) | 1.66 |  | 68 | 36.88  (9.34) | 32.97  (11.89) | 28.63  (13.60) | 0.88 | *F*(2) = 9.79  *p* < .001 | 0.68 | |
| UCLA-Care | 53 | 34.75  (12.26) | 33.98  (11.92) | 24.70  (12.15) | 0.82 |  | 61 | 33.52  (10.69) | 32.64  (10.22) | 29.70  (11.06) | 0.36 | *F*(2) = 6.09  *p* = .003 | 0.54 | |
| CPTCI | 53 | 56.92  (16.21) | 51.47  (17.61) | 40.70  (14.91) | 1.00 |  | 68 | 58.46  (15.63) | 56.40  (17.66) | 52.40  (17.80) | 0.39 | *F*(2) = 9.74  *p* < .001 | 0.61 | |
| CGAS | 53 | 56.49  (12.15) | - | 68.45  (16.34) | -0.98 |  | 69 | 58.93  (11.41) | - | 60.78  (15.71) | -0.16 | *F*(1) = 13.11  *p* < .001 | -0.69 | |
| CDI | 57 | 58.95  (12.50) | 56.40  (13.01) | 49.49  (12.25) | 0.76 |  | 70 | 63.03  (11.91) | 61.21  (12.96) | 59.99  (14.00) | 0.26 | *F*(2) = 5.38  *p* = .006 | 0.46 | |
| SCARED-Self | 54 | 30.59  (16.17) | 28.00  (16.96) | 19.41  (14.39) | 0.69 |  | 70 | 33.24  (15.00) | 30.79  (15.78) | 28.17  (17.63) | 0.34 | *F*(2) = 4.22  *p* = .020 | 0.37 | |
| SCARED-Care | 52 | 25.38  (14.28) | 23.54  (12.54) | 16.94  (10.87) | 0.59 |  | 65 | 21.86  (11.00) | 21.03  (13.17) | 18.80  (11.56) | 0.28 | *F*(2) = 4.71  *p* = .010 | 0.45 | |
| CBCL total | 55 | 69.62  (9.21) | 65.84  (9.16) | 60.67  (11.52) | 0.97 |  | 65 | 67.82  (7.28) | 67.20  (9.65) | 65.75  (10.25) | 0.28 | *F*(2) = 10.68  *p* < .001 | 0.69 | |
| Externalizing | 55 | 62.40  (12.21) | 60.36  (10.89) | 57.40  (12.14) | 0.41 |  | 65 | 62.14  (10.38) | 62.43  (11.72) | 61.92  (11.84) | 0.02 | *F*(2) = 8.47  *p* < .001 | 0.40 | |
| Internalizing | 55 | 70.95  (8.56) | 67.56  (9.62) | 61.02  (10.24) | 1.16 |  | 81 | 68.29  (7.85) | 67.14  (10.53) | 65.03  (10.52) | 0.42 | *F*(2) = 11.87  *p* < .001 | 0.71 | |
| ILK-Self | 53 | 63.75  (16.71) | 63.37  (16.49) | 73.32  (16.42) | -0.57 |  | 68 | 59.45  (16.24) | 59.66  (17.90) | 62.61  (18.03) | -0.19 | *F*(2) = .184  *p* = .170 | -0.36 | |
| ILK-Care | 51 | 59.10  (11.48) | 65.06 (12.42) | 69.61  (13.80) | -0.83 |  | 63 | 58.45  (13.85) | 58.96  (15.78) | 62.13 (15.21) | -0.25 | *F*(2) = 2.47  *p* = .095 | -0.58 | |
| *Note.* CAPS-CA = Clinician-Administered PTSD Scale for Children and Adolescents; UCLA = The University of California at Los Angeles post-traumatic stress disorder reaction index (Self = Self-report; Care = Caregiver Report); CPTCI = Child Post-Traumatic Cognitions Inventory; CGAS = Children’s Global Assessment Scale; CDI = Children’s depression inventory; SCARED = Screen for Anxiety Related Emotional Disorders; CBCL = Child Behavior Checklist; ILK = Quality of Life Inventory for Children and Adolescents. Greenhouse-Geisser corrected *p* values are reported above. | | | | | | | | | | | | | | |
